# Supplementary material for: Poly(glycerol monomethacrylate)-encapsulated upconverting nanoparticles prepared by miniemulsion polymerization: morphology, chemical stability, antifouling properties and toxicity evaluation
Source: Royal Society of Chemistry journal article supplement (doi:10.1039/d3na00793f), 2023-01-01
Supplement: d3na00793f1.pdf [file d3na00793f1.pdf]

## Electronic supplementary information

### **Poly(glycerol monomethacrylate)-encapsulated upconverting nanoparticles prepared by miniemulsion polymerization: Morphology, chemical stability, antifouling properties and toxicity evaluation**

Taras Vasylyshyn, Vitalii Patsula, Marcela Filipová, Rafal Lukasz Konefal, Daniel Horák\*

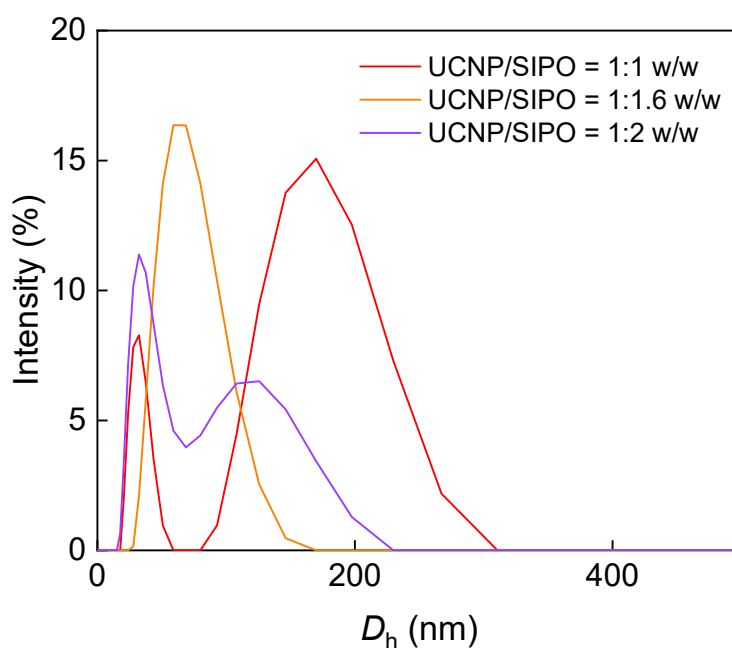

Figure S1. UCNP@SIPO particle size distribution in chloroform at UCNP/SIPO ratio (a) 1:1, (b) 1:1.6 and (c) 1:2 w/w according to DLS.

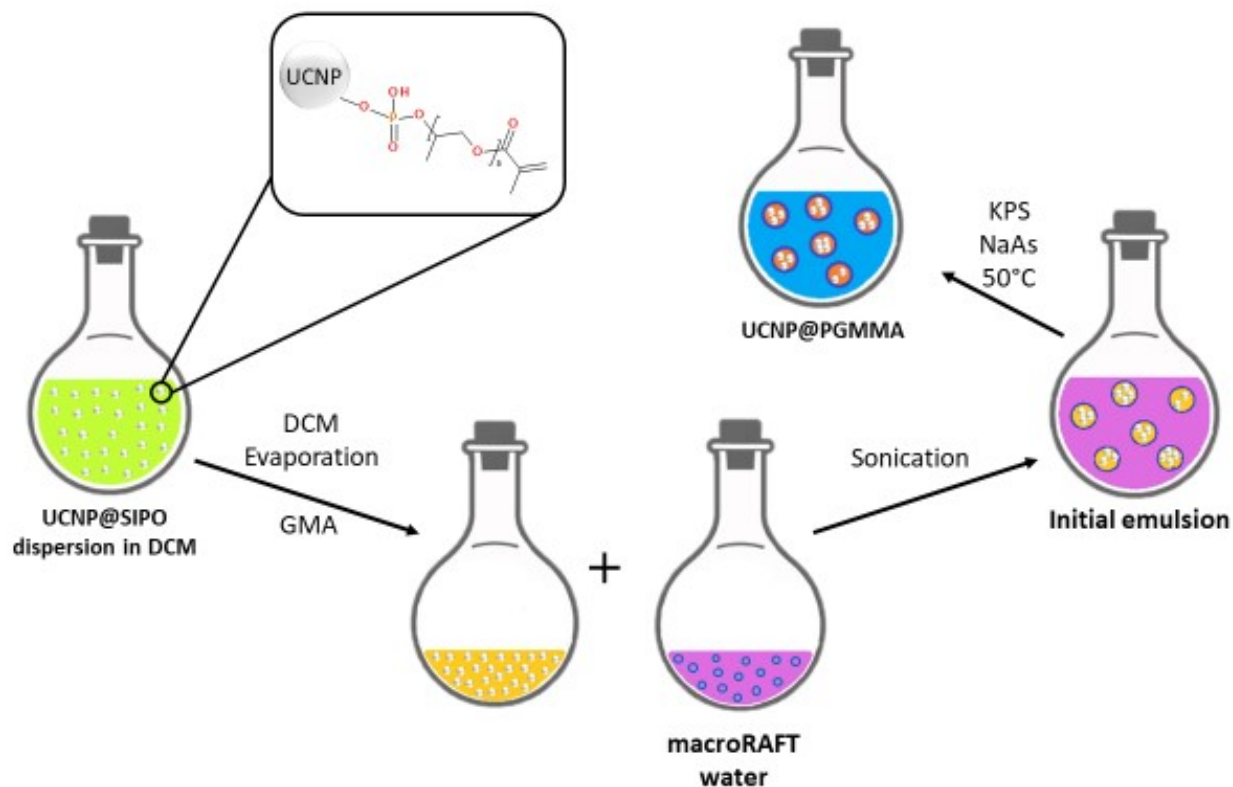

Figure S2. RAFT miniemulsion polymerization of GMA in the presence of UCNPs.

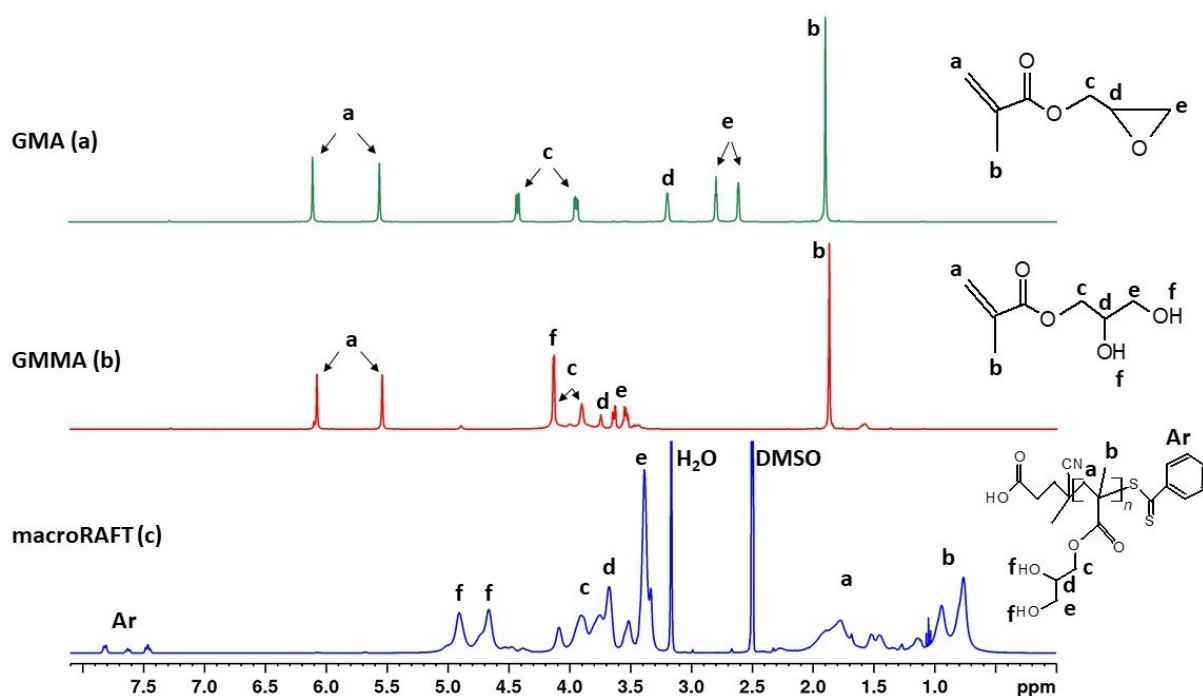

Figure S3. <sup>1</sup>H NMR spectra of (a) GMA, (b) GMMA and (c) macroRAFT agent.

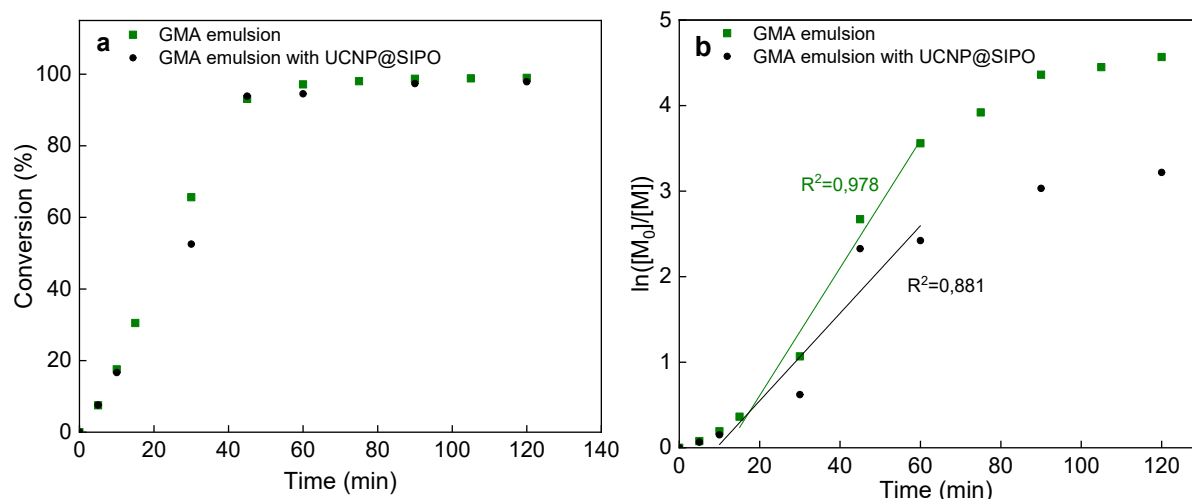

Figure S4. Time dependence of (a) GMA conversion and (b)  $\ln([M_0]/[M])$  to demonstrate kinetics of RAFT emulsion polymerization of GMA in the absence or presence of UCNP@SIPO particles.
